# Supplementary material for: The enhancement of oxygen sensitivity of ZnO macropore film by functionalizing with azo pigment
Source: Royal Society of Chemistry journal article supplement (doi:10.1039/b812937a), 2009-04-23
Supplement: b812937a.pdf [file b812937a.pdf]

## Supporting information

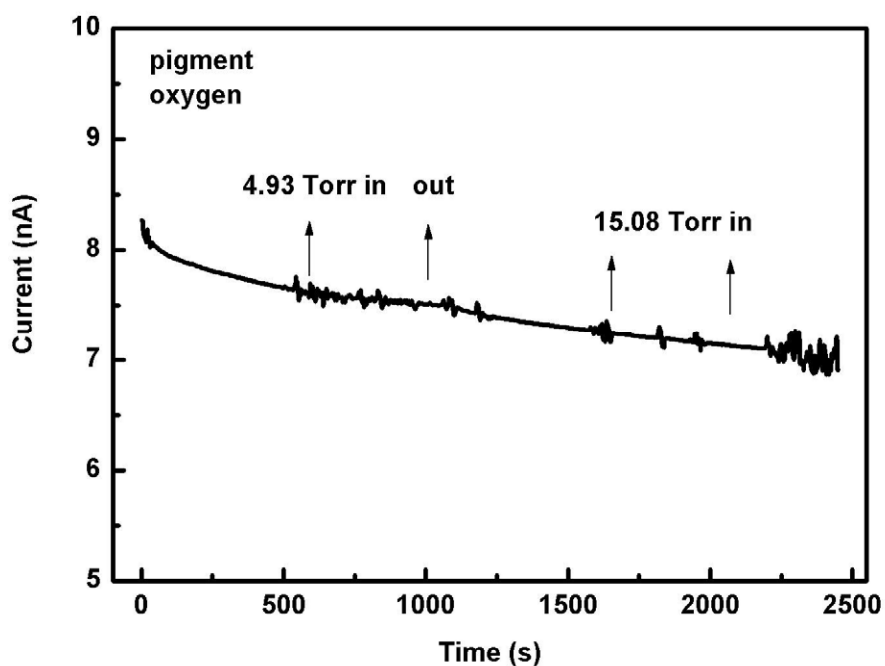

The oxygen-sensing of azo pigment without irradiation of 370 nm light is revealed. Various partial pressures of oxygen injections and extractions are shown by arrows.

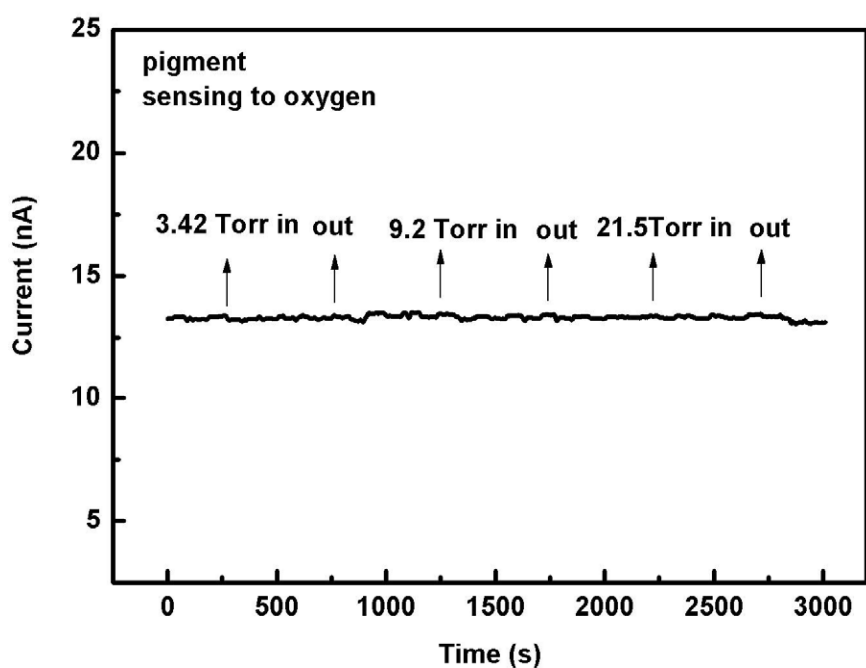

The oxygen-sensing of azo pigment with irradiation of 370 nm light is revealed. Various partial pressures of oxygen injections and extractions are shown by arrows.

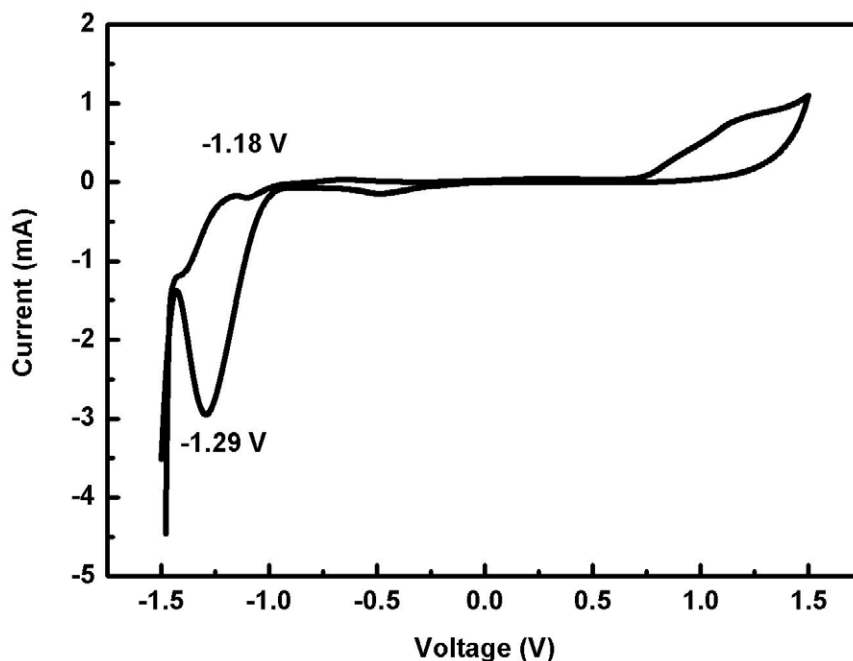

Cyclic voltammetry curve of azo pigment in the solution of DMF with 0.2 mol/L TBAP. The reduction potential of azo pigment is -1.47 V vs NHE (-1.23 V vs Ag/AgCl). The reduction potential of azo pigment is corresponding to its LUMO, whose energy level is -3.2 eV (vs vacuum). Actually, the LUMO also is the  $\pi^*$  orbit.

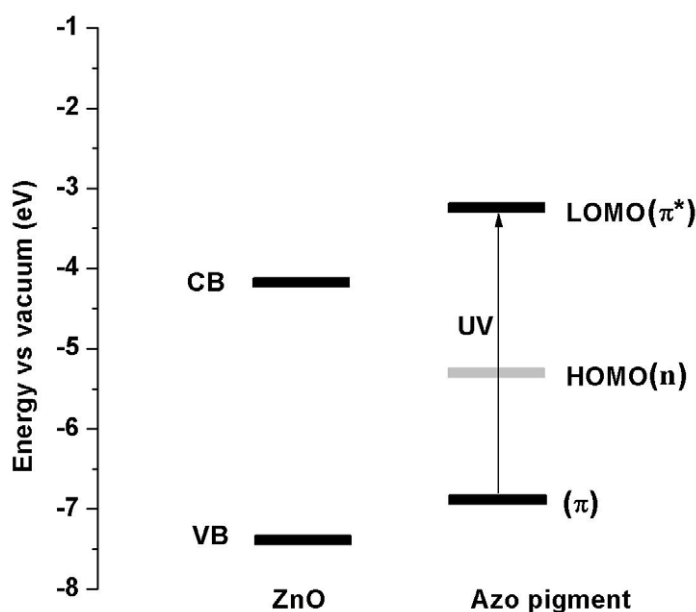

Under the UV light (370 nm) irradiation, the electrons transition is corresponding to the  $\pi - \pi^*$  transition. The energy level of  $\pi^*$  orbit is at -3.2 eV (vs vacuum), which is higher than that of conduction band (CB) minimum of ZnO, whose energy level is at -4.2 eV (YONG XU, MARTIN A.A. SCHOONEN, *The absolute energy positions of conduction and valence bands of selected semiconducting minerals, American Mineralogist, Volume 85, pages 543–556, 2000*). Therefore, the photoexcited electrons from the azo pigment can be filled into the CB of ZnO.
